# Supplementary material for: A Logistic Regression Model for Noninvasive Prediction of AFP-Negative Hepatocellular Carcinoma
Source: PubMed Central journal article supplement — Technol Cancer Res Treat. 2019 May 19;18:1533033819846632. doi: 10.1177/1533033819846632 (PMC6535757; doi:10.1177/1533033819846632), 2019-05-19
Supplement: Table_S1_and_S2.pdf [file Table_S1_and_S2.pdf]

Table S1 Demographical parameters analysis of Training set

| Parameters    | AFP-positive HCC patients | Healthy controls | P     |
|---------------|---------------------------|------------------|-------|
|               | n=171                     | n=102            |       |
| Age(year)     | 53.21±12.12               | 53.99±6.41       | 0.705 |
| Height(cm)    | 168.47±9.13               | 165.90±13.68     | 0.112 |
| Weight(kg)    | 61.98±12.84               | 63.78±13.49      | 0.232 |
| Gender(M:F)   | 125:46                    | 70:32            | 0.429 |
| Smoking(N:P)  | 120:51                    | 76:26            | 0.441 |
| Drinking(N:P) | 131:40                    | 80:22            | 0.728 |

Age, Height and Weight are expressed as mean ± SD;

M: male, F: female, N: negative, P: positive

TableS2 Diagnostic performances of hematological parameters in all groups of Training set.

| Parameters   | 171 AFP-negative HCC patients vs 102 Healthy controls |             |         |        |        | 60 AFP-positive HCC patients vs 102 Healthy controls |             |         |        |        |
|--------------|-------------------------------------------------------|-------------|---------|--------|--------|------------------------------------------------------|-------------|---------|--------|--------|
|              | AUC                                                   | 95% CI      | P value | Se (%) | Sp (%) | AUC                                                  | 95% CI      | P value | Se (%) | Sp (%) |
| MPV (fL)     | 0.652                                                 | 0.587-0.717 | <0.0001 | 64.3   | 62.8   | 0.630                                                | 0.533-0.727 | 0.006   | 48.3   | 81.4   |
| RDW(%)       | 0.772                                                 | 0.718-0.826 | <0.0001 | 57.3   | 86.3   | 0.728                                                | 0.640-0.816 | <0.0001 | 56.7   | 86.3   |
| MPV/PC ratio | 0.779                                                 | 0.724-0.834 | <0.0001 | 60.8   | 89.2   | 0.794                                                | 0.719-0.868 | <0.0001 | 63.3   | 89.2   |
| NLR          | 0.800                                                 | 0.749-0.852 | <0.0001 | 67.8   | 83.3   | 0.784                                                | 0.709-0.861 | <0.0001 | 70.0   | 80.4   |
| PLR          | 0.653                                                 | 0.589-0.717 | <0.0001 | 39.5   | 90.2   | 0.628                                                | 0.535-0.722 | 0.005   | 50.0   | 75.5   |

Se: sensitivity ; Sp: specificity
